# Supplementary material for: Adapting Genotyping-by-Sequencing for Rice F2 Populations
Source: PubMed Central journal article supplement (PMC5345719; doi:10.1534/g3.116.038190), 2017-01-11

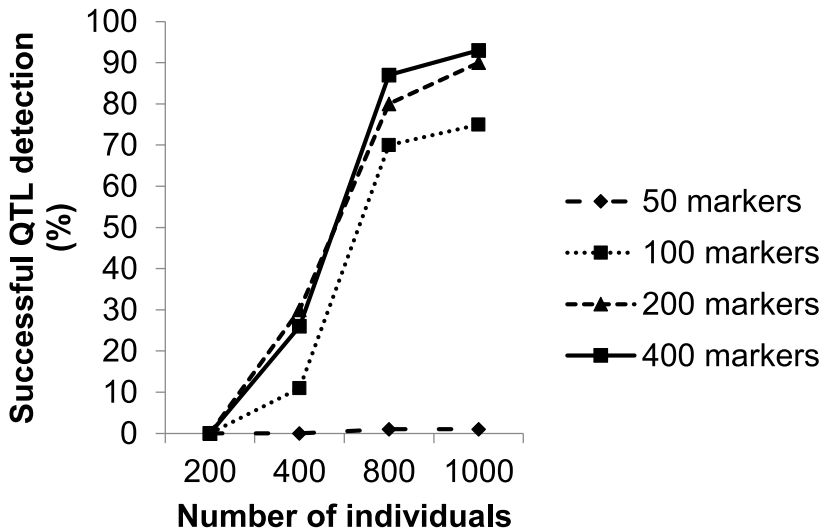

Supplement: 881FigureS1.pdf [file 881FigureS1.pdf]
